# Supplementary material
Source: publisher figshare collection journal article supplement (https://frontiersin.figshare.com/ndownloader/files/12864650)

Fig. S2: The differential genera between season from Kruskal-Wallis rank sum test.  
Red colored spots indicate genera with  $P < 0.05$  and green colored spots indicate genera with  $P \geq 0.05$ .

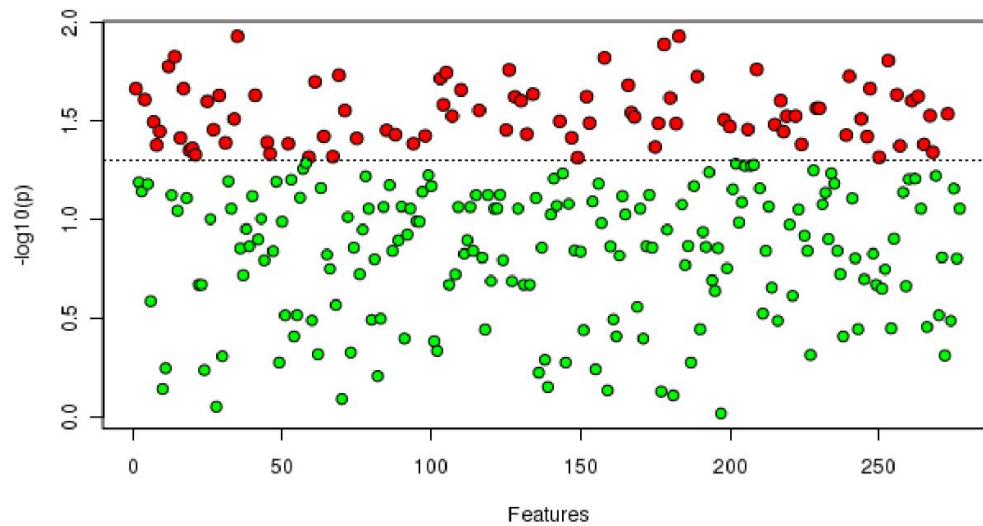

Supplement: Supplementary file [file 12864650]
